# Supplementary material for: Effects of phytosterol supplementation on lipid profiles in patients with hypercholesterolemia: a systematic review and meta-analysis of randomized controlled trials
Source: Royal Society of Chemistry journal article supplement (doi:10.1039/d2fo03663k), 2023-01-01
Supplement: d2fo03663k1.pdf [file d2fo03663k1.pdf]

'There is no supplementary information available for this article'.
